# Supplementary material for: Effect of Human Myotubes-Derived Media on Glucose-Stimulated Insulin Secretion
Source: Hindawi journal article supplement (doi:10.1155/2017/1328573), 2017-01-01

## Supplementary legends

### **Table S1. Myokine presence in conditioned media from human myotubes.**

Protein expression normalized to internal positive control.

Non-detectable: protein expression below 3-fold negative control.

Treated-/non-treated ratio corresponds to protein expression for non-insulin-treated relative to insulin-treated myotubes. Ratios  $\leq 0.8$  and  $\geq 1.2$  were considered as an insulin induced change.

n=2

### **Figure S1. Cytokines/chemokines antibody array**

Cytokine/Chemokine array layout (A). Array membranes from non-insulin treated and insulin-treated myotubes conditioned media (B) of one representative experiment.

# Supplementary data

Table S1

|              | Expression in conditioned media from |                          | Treated-/non- |
|--------------|--------------------------------------|--------------------------|---------------|
|              | Non-treated-myotubes                 | Insulin-treated myotubes | treated ratio |
|              | (mean $\pm$ SD)                      | (mean $\pm$ SD)          |               |
| GCP2         | 0.21 $\pm$ 0.05                      | Non-detectable           |               |
| MIP3alpha    | 0.23 $\pm$ 0.06                      | Non-detectable           |               |
| MIF          | 0.25 $\pm$ 0.01                      | 0.16 $\pm$ 0.09          | 0.62          |
| CCL23        | 0.15 $\pm$ 0.04                      | Non-detectable           |               |
| ENA-78/CXCL5 | 0.32 $\pm$ 0.16                      | 0.21 $\pm$ 0.19          | 0.64          |
| NT3          | 0.29 $\pm$ 0.08                      | 0.19 $\pm$ 0.06          | 0.66          |
| MCP1/CCL2    | 0.87 $\pm$ 0.47                      | 0.58 $\pm$ 0.53          | 0.66          |
| PLGF         | 0.19 $\pm$ 0.01                      | Non-detectable           |               |
| GDNF         | 0.29 $\pm$ 0.06                      | 0.20 $\pm$ 0.13          | 0.68          |
| IL6          | 0.15 $\pm$ 0.07                      | Non-detectable           |               |
| IL16         | 0.16 $\pm$ 0.04                      | Non-detectable           |               |
| IP10         | 0.15 $\pm$ 0.07                      | Non-detectable           |               |

|           |                 |                 |      |
|-----------|-----------------|-----------------|------|
| HGF       | $0.23 \pm 0.06$ | $0.17 \pm 0.11$ | 0.74 |
| TGFbeta2  | $0.28 \pm 0.01$ | $0.21 \pm 0.09$ | 0.75 |
| FGF9      | $0.16 \pm 0.00$ | Non-detectable  |      |
| IL8/CXCL8 | $0.87 \pm 0.57$ | $0.66 \pm 0.40$ | 0.75 |
| TIMP2     | $0.54 \pm 0.05$ | $0.42 \pm 0.11$ | 0.79 |
| M-CSF     | $0.17 \pm 0.08$ | Non-detectable  |      |
| RANTES/C  | $0.28 \pm 0.05$ | $0.23 \pm 0.08$ | 0.84 |
| CL5       |                 |                 |      |
| IGFBP1    | $0.22 \pm 0.08$ | $0.18 \pm 0.11$ | 0.84 |
| IL1alpha  | $0.21 \pm 0.01$ | $0.18 \pm 0.02$ | 0.85 |
| NAP2/CXC  | $0.43 \pm 0.02$ | $0.37 \pm 0.13$ | 0.86 |
| L7        |                 |                 |      |
| IL1beta   | $0.18 \pm 0.03$ | $0.16 \pm 0.00$ | 0.89 |
| TIMP1     | $0.57 \pm 0.06$ | $0.52 \pm 0.20$ | 0.91 |
| OSM       | $0.18 \pm 0.04$ | $0.16 \pm 0.07$ | 0.91 |
| GRO/      | $1.00 \pm 0.52$ | $0.92 \pm 0.35$ | 0.92 |
| CXCL1,2&3 |                 |                 |      |
| IL3       | $0.16 \pm 0.05$ | Non-detectable  |      |

|          |                 |                 |      |
|----------|-----------------|-----------------|------|
| IGFBP2   | $0.24 \pm 0.04$ | $0.24 \pm 0.09$ | 0.98 |
| LIF      | $0.18 \pm 0.00$ | $0.18 \pm 0.06$ | 1.00 |
| EOTAXIN2 | $0.16 \pm 0.07$ | $0.18 \pm 0.11$ | 1.09 |
| IL10     | $0.16 \pm 0.08$ | $0.20 \pm 0.05$ | 1.22 |
| ANG      | Non-detectable  | $0.20 \pm 0.08$ |      |
| MIP-1    | $0.19 \pm 0.06$ | $0.50 \pm 0.40$ | 2.63 |

Figure S1

A

|          | <b>A</b>        | <b>B</b>        | <b>C</b>    | <b>D</b>     | <b>E</b>       | <b>F</b>               | <b>G</b>         | <b>H</b>    | <b>I</b>      | <b>J</b>       | <b>K</b>     |
|----------|-----------------|-----------------|-------------|--------------|----------------|------------------------|------------------|-------------|---------------|----------------|--------------|
| <b>1</b> | POS             | POS             | POS         | POS          | NEG            | NEG                    | ENA-78/<br>CXCL5 | G-CSF       | GM-CSF        | GRO            | GRO $\alpha$ |
| <b>2</b> | I-309           | IL1 $\alpha$    | IL1 $\beta$ | IL2          | IL3            | IL4                    | IL5              | IL6         | IL7           | IL8/<br>CXCL8  | IL10         |
| <b>3</b> | IL12p40/<br>p70 | IL13            | IL15        | IFN $\gamma$ | MCP1/<br>CCL2  | MCP2/<br>CCL8          | MCP3/<br>CCL7    | M-CSF       | MDC           | MIG            | MIP-1        |
| <b>4</b> | MIP-1 $\delta$  | RANTES/<br>CCL5 | SCF         | SDF1         | TARC           | TGF $\beta$ 1          | TNF $\alpha$     | TNF $\beta$ | EFG           | IGF-1          | ANG          |
| <b>5</b> | OSM             | THPO            | VEGF        | PDGF BB      | LEPTIN         | BDNF                   | BLC              | CCL23       | Eotaxin<br>1  | Eotaxin<br>2   | Eotaxin<br>3 |
| <b>6</b> | FGF4            | FGF6            | FGF7        | FGF9         | Flt3<br>Ligand | Fractalkine/<br>CX3CL1 | GCP2             | GDNF        | HGF           | IGFBP1         | IGFBP2       |
| <b>7</b> | IGFBP3          | IGFBP4          | IL16        | IP10         | LIF            | LIGHT                  | MCP4/<br>CCL13   | MIF         | MIP3 $\alpha$ | NAP2/<br>CXCL7 | NT3          |
| <b>8</b> | NT4             | OPN             | OPG         | PARC         | PLGF           | TGF $\beta$ 2          | TGF $\beta$ 3    | TIMP1       | TIMP2         | POS            | POS          |

B

Conditioned media from

Non-insulin-treated myotubes

Insulin-treated myotubes

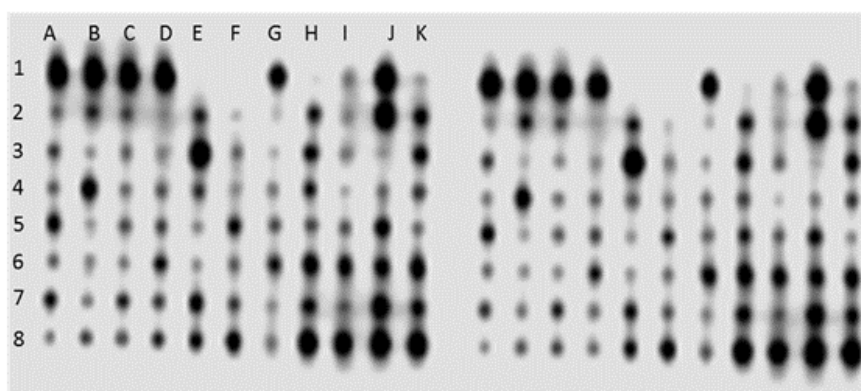

Supplement: f1 [file 1328573.f1.pdf]
